# Supplementary material for: Postoperative chemotherapy as adjuvant treatment for endometrioid adenocarcinoma: early stage vs late stage
Source: Springer Nature journal article supplement (doi:10.1007/s00280-019-03847-w), 2019-04-29
Supplement: MOESM1 [file 16684542]

Table S1 Cumulative survival rate of overall survival in patients with different stages

| FIGO stage | Dead/Total | Overall survival | | |
| --- | --- | --- | --- | --- |
| 1-year cumulative survival(%) | 3-year cumulative survival(%) | 5-year cumulative survival(%) |
| I-II | 13/235 | 99.5 | 94.8 | 87.1 |
| III-IV | 6/37 | 97.2 | 93.6 | 64.8 |

Table S2 Cumulative survival rate of recurrence-free survival in patients with different stages

| FIGO stage | Recurrence/Total | Recurrence-free survival | | |
| --- | --- | --- | --- | --- |
| 1-year cumulative survival(%) | 3-year cumulative survival(%) | 5-year cumulative survival(%) |
| I-II | 24/235 | 99.1 | 92.4 | 74.4 |
| III-IV | 11/37 | 91.4 | 73.3 | 50.7 |
